# Supplementary material for: Efficient electrocatalyst of α-Fe2O3 nanorings for oxygen evolution reaction in acidic conditions
Source: Royal Society of Chemistry journal article supplement (doi:10.1039/d0ra04262e), 2020-01-01
Supplement: d0ra04262e1.pdf [file d0ra04262e1.pdf]

## Efficient electrocatalyst of $\alpha$ -Fe<sub>2</sub>O<sub>3</sub> nanorings for oxygen evolution reaction in acidic condition

Xiaolei Liang,<sup>a, b</sup> Jinmei Qian,<sup>b</sup> Yonggang Liu,<sup>b</sup> Zhengmei Zhang,<sup>b</sup> Daqiang Gao<sup>b\*</sup>

<sup>a</sup>Department of obstetrics and gynecology, the First Hospital of Lanzhou University, Key Laboratory for Gynecologic Oncology Gansu Province, China.

<sup>b</sup>Key Laboratory for Magnetism and Magnetic Materials of MOE, Key Laboratory of Special Function Materials and Structure Design of MOE, Lanzhou University, Lanzhou 730000, China

\*E-mail: gaodq@lzu.edu.cn

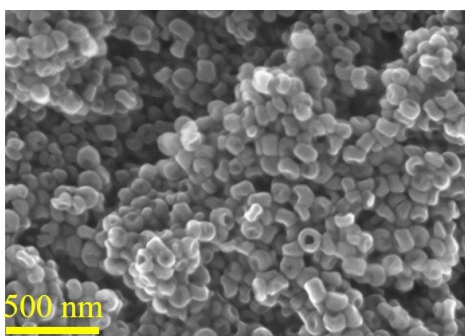

Figure S1. The SEM image of  $\alpha$ -Fe<sub>2</sub>O<sub>3</sub> NRs.

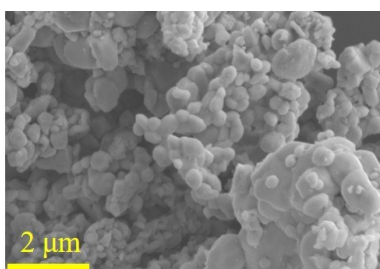

Figure S2. The HRTEM images of bulk  $\alpha$ -Fe<sub>2</sub>O<sub>3</sub>.

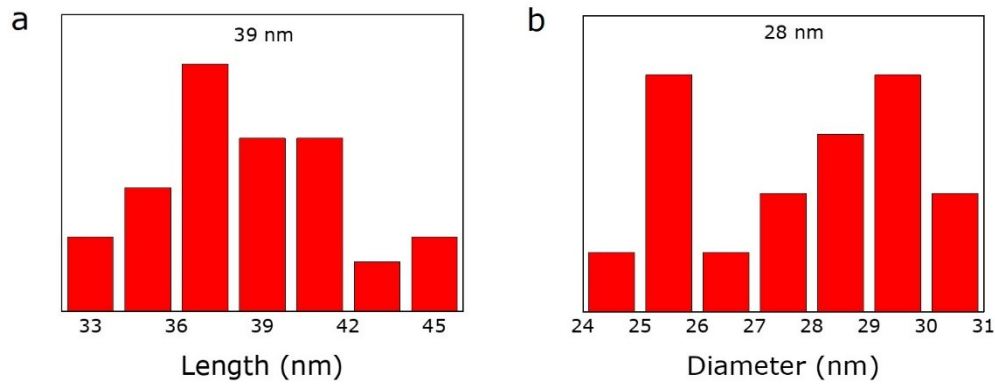

Figure S3. The length (a) and diameter (b) of nanorings of  $\alpha$ -Fe<sub>2</sub>O<sub>3</sub> NRs.

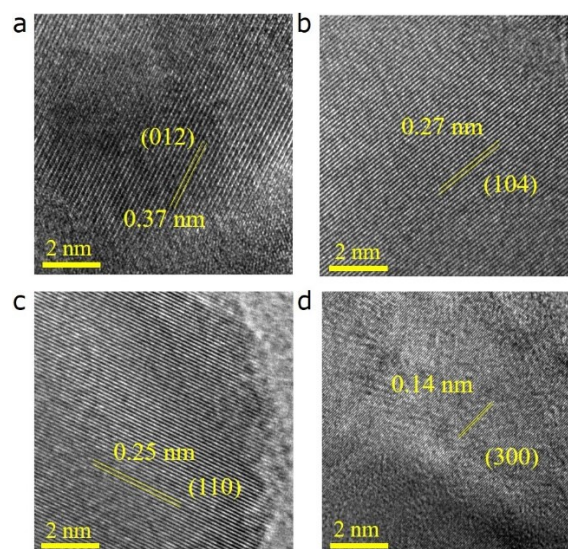

Figure S4. The HRTEM images of  $\alpha$ -Fe<sub>2</sub>O<sub>3</sub> NRs with perpendicular to (a-c) and along the nanoring direction (d).

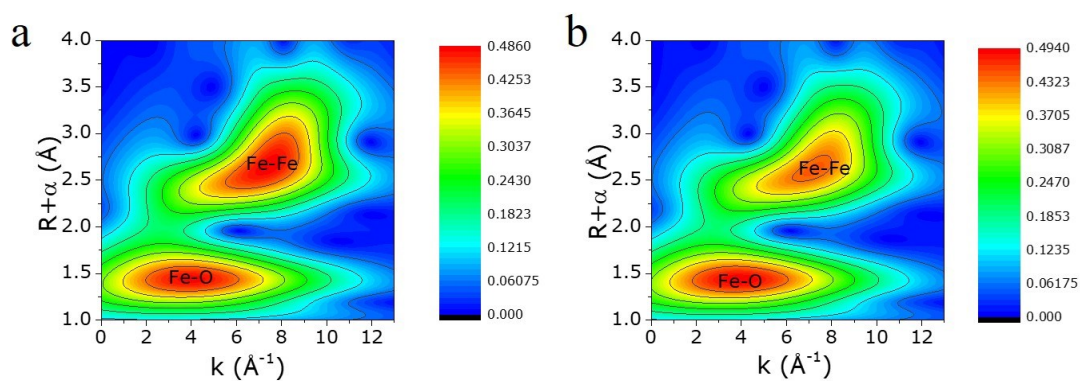

Figure S5: WT for the  $k^3$ -weighted EXAFS signals for (a) bulk  $\alpha$ -Fe<sub>2</sub>O<sub>3</sub> and (b)  $\alpha$ -Fe<sub>2</sub>O<sub>3</sub> NRs.

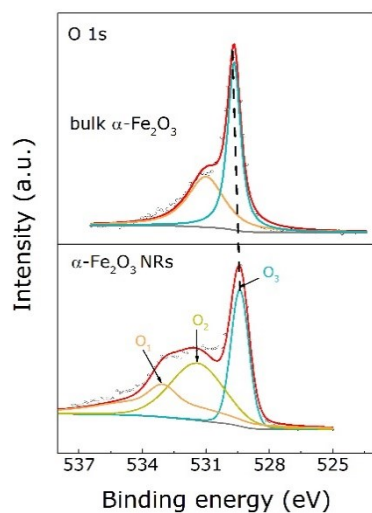

Figure S6. The XPS results of O 1s for bulk  $\alpha\text{-Fe}_2\text{O}_3$  and  $\alpha\text{-Fe}_2\text{O}_3$  NRs, where the peaks of bulk  $\alpha\text{-Fe}_2\text{O}_3$  shift to higher binding energy ( $\sim 0.3$  eV).

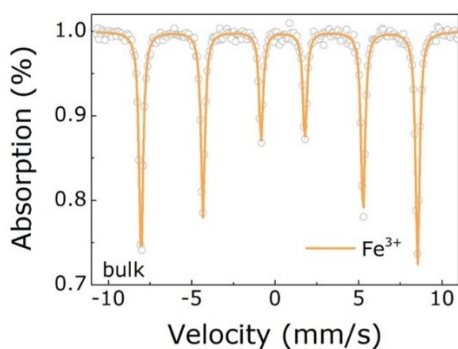

Figure S7. The Mossbauer spectrum of bulk  $\alpha\text{-Fe}_2\text{O}_3$ .

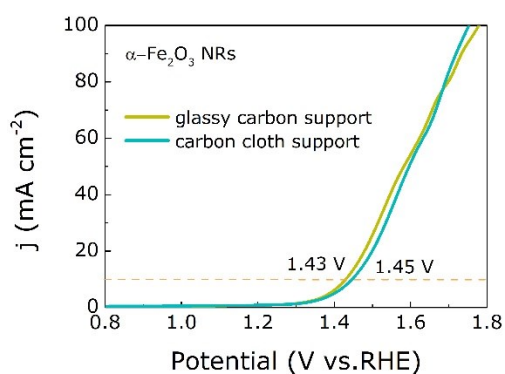

Figure S8. LSV curves of  $\alpha\text{-Fe}_2\text{O}_3$  NRs electrocatalyst based on glassy carbon support and carbon cloth support.

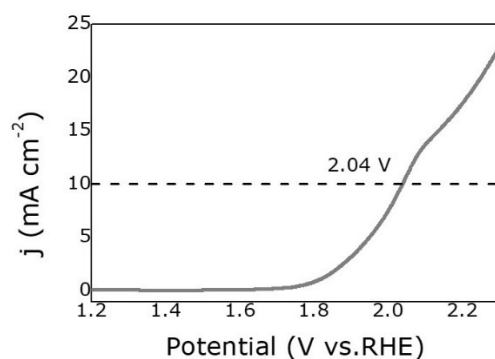

Figure S9. The LSV curve of  $\alpha$ -Fe<sub>2</sub>O<sub>3</sub> NRs electrocatalyst free substrate.

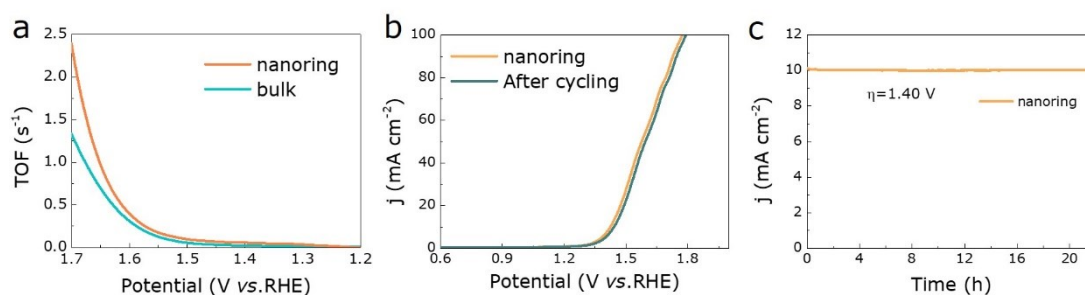

Figure S10. (a) The TOF curves of the  $\alpha$ -Fe<sub>2</sub>O<sub>3</sub> NRs and bulk  $\alpha$ -Fe<sub>2</sub>O<sub>3</sub> ( $TOF = j \times S/4 \times F \times n$ , where  $j$  is the measured current density,  $S$  is the electrode geometric area,  $F$  is the Faraday's constant of 96485.3 C mol<sup>-1</sup>,  $n$  is the moles of coated Fe atom on the electrode). (b) LSV curves of  $\alpha$ -Fe<sub>2</sub>O<sub>3</sub> NRs before and after stability test of 10000 cycles and (c) I-t curve of  $\alpha$ -Fe<sub>2</sub>O<sub>3</sub> NRs.

Table S1. EXAFS fitting parameters at the Fe K-edge for bulk  $\alpha$ -Fe<sub>2</sub>O<sub>3</sub> and (b)  $\alpha$ -Fe<sub>2</sub>O<sub>3</sub> NRs. ( $S_0^2=0.70$ )

| Sample                                        | Shell | $N^a$   | $R(\text{\AA})^b$ | $\sigma^2 \times 10^3 (\text{\AA}^2)^c$ | $\Delta E_0 (\text{eV})^d$ | R factor |
|-----------------------------------------------|-------|---------|-------------------|-----------------------------------------|----------------------------|----------|
| bulk $\alpha$ -Fe <sub>2</sub> O <sub>3</sub> | Fe-O  | 6.0±1.3 | 1.96±0.02         | 12.0±2.5                                | -7.9±3.0                   | 0.010    |
|                                               | Fe-Fe | 6.7±1.1 | 2.99±0.01         | 9.2±1.3                                 | 3.1±1.7                    |          |
|                                               | Fe-Fe | 3.0±0.9 | 3.67±0.01         | 2.9±1.6                                 | 6.7±1.1                    |          |
| $\alpha$ -Fe <sub>2</sub> O <sub>3</sub> NRs  | Fe-O  | 6.2±1.5 | 1.96±0.02         | 12.0±2.7                                | -9.0±3.3                   | 0.010    |
|                                               | Fe-Fe | 6.8±1.1 | 3.00±0.01         | 8.6±1.2                                 | 3.3±1.7                    |          |
|                                               | Fe-Fe | 3.3±0.9 | 3.67±0.01         | 2.5±1.5                                 | -8.9±2.6                   |          |

<sup>a</sup> $N$ : coordination numbers; <sup>b</sup> $R$ : bond distance; <sup>c</sup> $\sigma^2$ : Debye-Waller factors; <sup>d</sup> $\Delta E_0$ : the inner potential correction.  $R$  factor: goodness of fit.

Table S2. The Mössbauer spectra related parameters.

| Sample                                        | Isomer shift (mm) | Magnetic field (T) |
|-----------------------------------------------|-------------------|--------------------|
| Bulk $\alpha$ -Fe <sub>2</sub> O <sub>3</sub> | 0.36432           | 50.40895           |
| $\alpha$ -Fe <sub>2</sub> O <sub>3</sub> NRs  | 0.36387           | 50.39407           |

Table S3. The electrocatalytic OER performances of some reported electrocatalysts.

| Electrocatalyst                                                                   | electrolyte | Potential (V)<br>at 10 mA cm <sup>-2</sup> | Tafel<br>slope<br>(mV<br>dec <sup>-1</sup> ) | TOF<br>(s <sup>-1</sup> ) | Reference |
|-----------------------------------------------------------------------------------|-------------|--------------------------------------------|----------------------------------------------|---------------------------|-----------|
| Fe <sub>2</sub> O <sub>3</sub> -(012)-O                                           | 1 M NaOH    | 1.53                                       | 51.8                                         | 0.197                     | [1]       |
| Fe <sub>2</sub> O <sub>3</sub> -(104)                                             | 1 M NaOH    | 1.62                                       | 62.5                                         | 0.049                     | [1]       |
| FC-2                                                                              | 0.1 M KOH   | 1.56                                       | 45                                           | /                         | [2]       |
| $\alpha$ -Fe <sub>2</sub> O <sub>3</sub> @g-C<br><sub>3</sub> N <sub>4</sub> -NCs | 0.5 M KOH   | 1.65                                       | 280                                          | /                         | [3]       |
| $\alpha$ -Fe <sub>2</sub> O <sub>3</sub> NPs                                      | 0.5 M KOH   | 1.76                                       | 320                                          | /                         | [3]       |
| CM/TiO <sub>2-x</sub> /CP                                                         | 1 M KOH     | 1.47                                       | 67.1                                         | /                         | [4]       |
| NiFeSe@NiSe O<br>@CC                                                              | 1 M KOH     | 1.50                                       | 63.2                                         | /                         | [5]       |

|                                           |                                         |      |      |     |           |
|-------------------------------------------|-----------------------------------------|------|------|-----|-----------|
| <b>FeN<sub>x</sub>/NF/EG</b>              | 0.5 M<br>H <sub>2</sub> SO <sub>4</sub> | 1.82 | 129  | /   | [6]       |
| <b>Fe-Fe<sub>2</sub>O<sub>3</sub></b>     | pH=0                                    | 2.14 | /    | /   | [7]       |
| <b>Fe-Co/Fe<sub>2</sub>O<sub>3</sub></b>  | pH=0                                    | 2.18 | /    | /   | [7]       |
| <b>Co-Co/Fe<sub>2</sub>O<sub>3</sub></b>  | pH=0                                    | 1.86 | /    | /   | [7]       |
| <b>Rh<sub>22</sub>Ir<sub>78</sub> NPs</b> | 0.5 M<br>H <sub>2</sub> SO <sub>4</sub> | 1.52 | 101  | 5.1 | [8]       |
| <b>Mn-RuO<sub>2</sub></b>                 | 0.5 M<br>H <sub>2</sub> SO <sub>4</sub> | 1.39 | 42.9 | 0.4 | [9]       |
| <b>α-Fe<sub>2</sub>O<sub>3</sub> NRs</b>  | 1 M HCl                                 | 1.43 | 138  | 2.3 | This work |
| <b>Bulk α-Fe<sub>2</sub>O<sub>3</sub></b> | 1 M HCl                                 | 1.89 | 350  | 1.3 | This work |

## Reference

- 1 H. Wu, T. Yang, Y. H. Du, L. S. Shen, G.W. Ho , *Adv. Mater.*, 2018, **30**, 1804341
- 2 T. W. Odedairo, X. C. Yan, K. Ostrikov, Z. H. Zhu, *Adv. Mater.*, 2017, **29**, 1703792.
- 3 O. Alduhaish, M. Ubaidullah, et. al, *Adv. Mater.*, 2019, **9**, 14139.
- 4 F. L. Meng, G. Yilmaz, T. P. Ding, M. M. Gao, and G. W. Ho, *Adv. Mater.*, 2019, **31**, 1903605.
- 5 G. Yilmaz, C. F. Tan, Y. F. Lim, and G. W. Ho, *Adv. Energy Mater.*, 2018, 1802983
- 6 C. J. Lei, et al. *Adv. Energy Mater.*, 2018, **8**, 1801912.1-1801912.7.
- 7 N. Lu, W. H. Zhang, X. J. Wu, *Chin. J. Chem. Phys.* 2017, **30**.
- 8 H. Y. Guo, et al. *ACS Nano*, 2019, **13**, 13225-13234.
- 9 S. Chen, et al. *ACS Catalysis*. 2019, **10**, 1152-1160.
